# Supplementary material for: Inhibition of glucose metabolism selectively targets autoreactive follicular helper T cells
Source: PubMed Central journal article supplement (PMC6197193; doi:10.1038/s41467-018-06686-0), 2018-10-22
Supplement: 41467_2018_6686_MOESM1_ESM.pdf [file 41467_2018_6686_MOESM1_ESM.pdf]

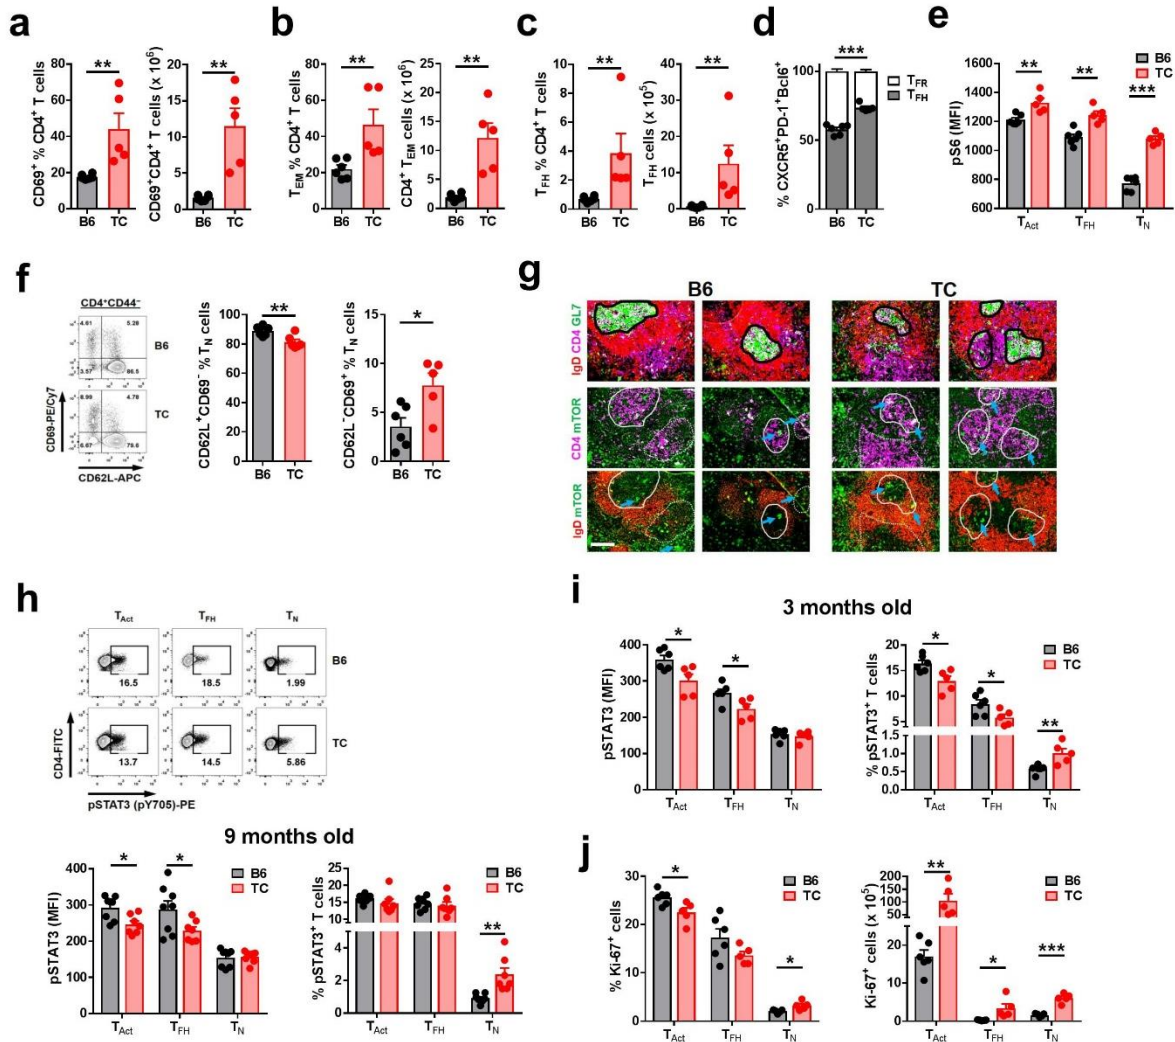

**Supplementary Fig. 1** Increased activation and mTORC1 activity in splenic CD4<sup>+</sup> T cells from pre-autoimmune lupus mice. Frequency and absolute number of CD69<sup>+</sup> cells (**a**), T<sub>EM</sub> cells (**b**) and T<sub>FH</sub> cells (**c**) in CD4<sup>+</sup> T cells, and relative distribution of T<sub>FH</sub> and T<sub>FR</sub> cells shown as stacked columns. For clarity, the individual values for T<sub>FR</sub> samples are not shown. (**d**). **e** Phospho-S6 MFI in T<sub>N</sub>, T<sub>Act</sub> and T<sub>FH</sub> cells. **f** Frequency of CD62L<sup>+</sup>CD69<sup>-</sup> and CD62L<sup>-</sup>CD69<sup>+</sup> in T<sub>N</sub> cells from aged mice. **g** Representative immunofluorescence staining in spleens of B6 and TC mice. The top row shows GL7<sup>+</sup> (green) positive GCs containing CD4<sup>+</sup> T cells (purple) but excluding IgD<sup>+</sup> (red) B cells, outlined with a black line. The same GCs are shown below with mTOR (green) staining relative to CD4<sup>+</sup> T cells (middle) and to non-GC B cells (bottom). GCs are outlined with a plain line and the T cell zone with a dashed line. Arrows point to representative mTOR staining. All images are shown with a 20x magnification (scale bar: 100uM). Representative pSTAT3 staining in B6 and TC T<sub>Act</sub>, T<sub>FH</sub> and T<sub>N</sub> cells, and pSTAT3 MFI (middle) and frequency (right) in aged (**h**) and young (**i**) mice. **j** Frequency and number of Ki-67<sup>+</sup> proliferating T<sub>Act</sub>, T<sub>FH</sub> and T<sub>N</sub> cells, from 3 month-old B6 and TC mice. Mean + s. e. m. of N = 3 – 8 mice per group compared with t tests. \**P* < 0.05, \*\**P* < 0.01, and \*\*\**P* < 0.001.

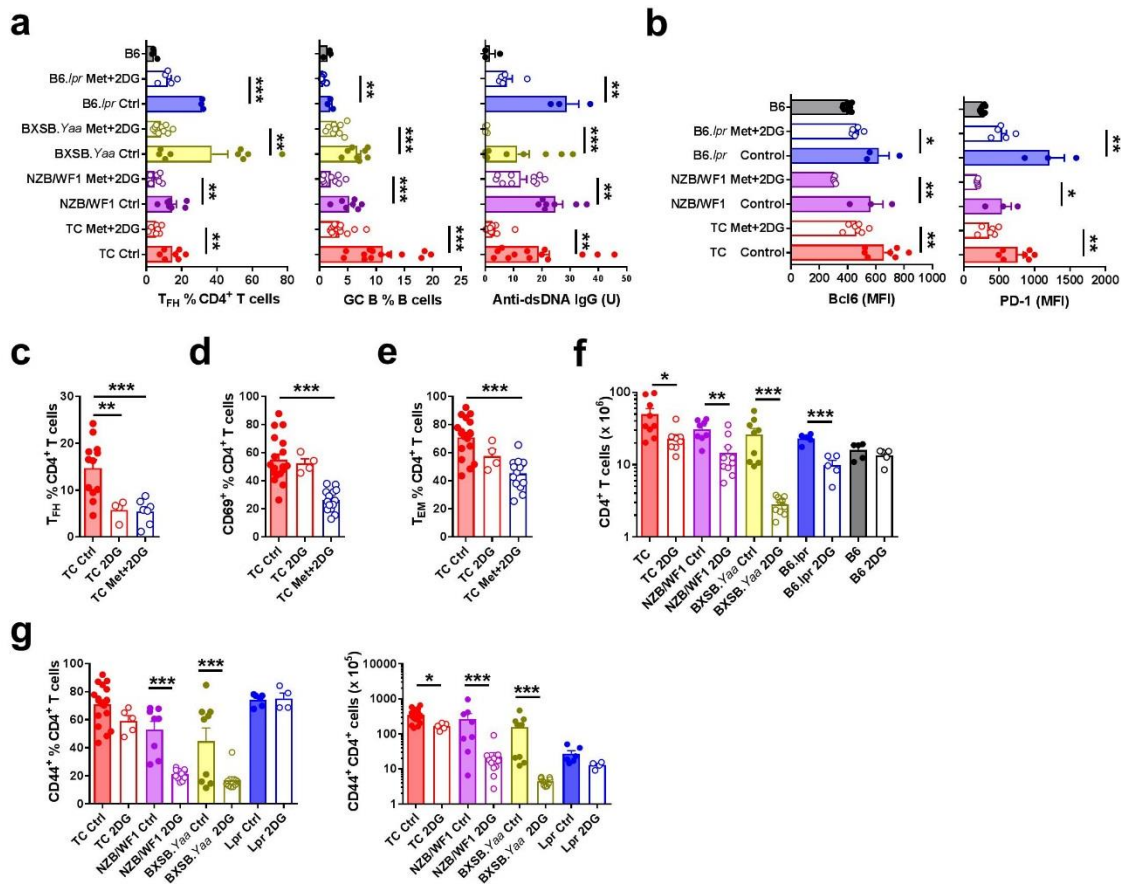

**Supplementary Fig. 2** The addition of metformin does not enhance the effect of glycolysis inhibition on T<sub>FH</sub> cells from lupus-prone mice. Anti-dsDNA IgG positive lupus-prone mice from the indicated strains were treated with Metformin + 2DG for 8 weeks and compared to untreated age-matched controls. Contemporaneous untreated B6 mice are shown as reference. **a** Frequency of T<sub>FH</sub> cells (left, CD4<sup>+</sup>CXCR5<sup>+</sup>PD1<sup>+</sup>Bcl6<sup>+</sup>Foxp3<sup>-</sup>) in splenic CD4<sup>+</sup> T cells and GC B cells (middle, B220<sup>+</sup>GL7<sup>+</sup>Fas<sup>+</sup>) in B cells, as well as serum anti-dsDNA IgG (right). **b** Bcl6 and PD-1 MFI on total CD4<sup>+</sup> T cells. Frequency of T<sub>FH</sub> cells (**c**), CD69<sup>+</sup> cells (**d**), and T<sub>EM</sub> cells (**e**) in CD4<sup>+</sup> T cells from 6 month-old TC mice treated for 8 weeks with 2DG, the combination of Metformin + 2DG, or untreated controls. **f** Number of total CD4<sup>+</sup> T cells. **g** Frequency and number of CD44<sup>+</sup> CD4<sup>+</sup> T cells for each of the lupus strain treated or not with 2DG. Mean + s. e. m. of N = 4 – 18 mice per group compared with t tests. \**P* < 0.05, \*\**P* < 0.01, and \*\*\**P* < 0.001. Statistical comparisons are within strains between treated and control mice.

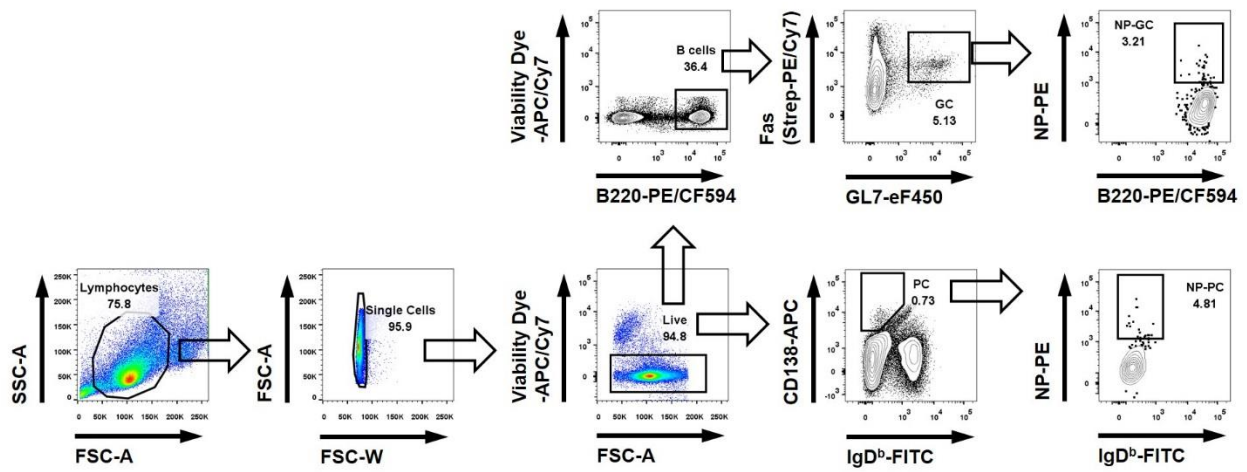

**Supplementary Fig. 3** Representative gating strategy for splenic GC B cells and plasma cells used in Figure 3.

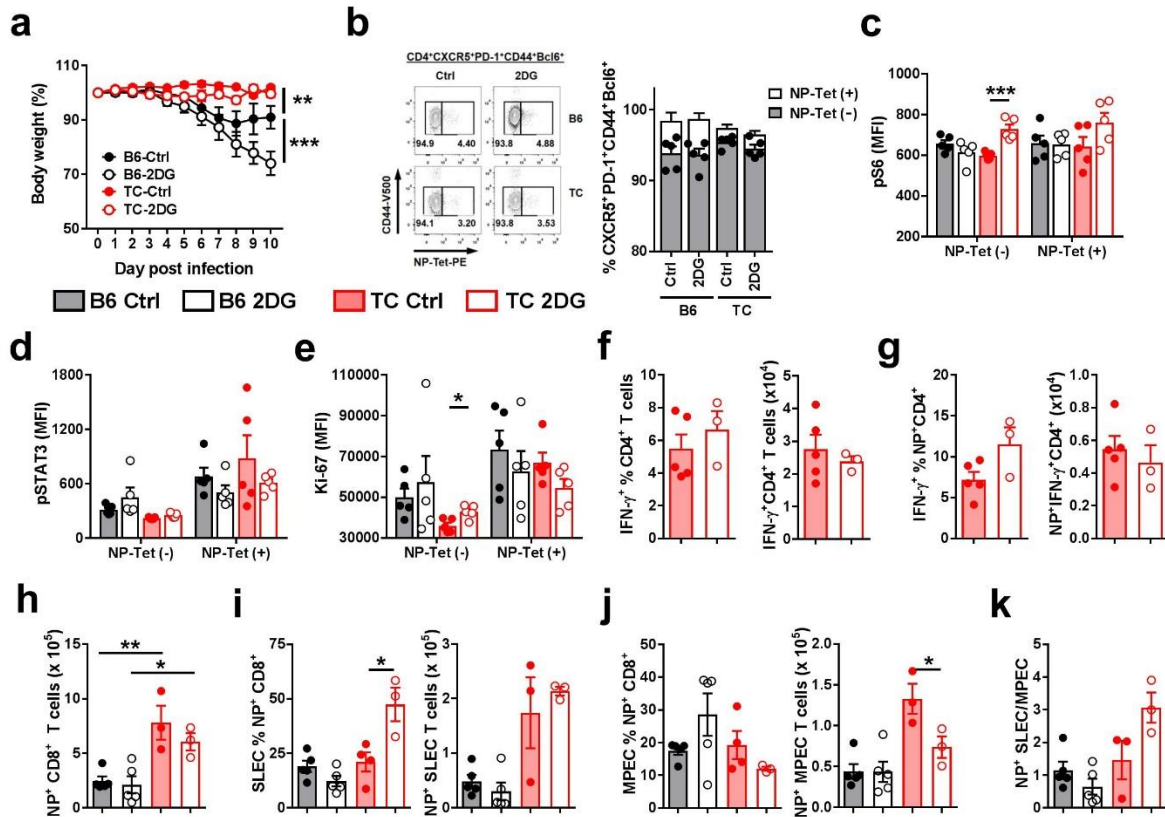

**Supplementary Fig. 4** Effect of glycolysis inhibition on T cell responses to influenza virus. B6 and TC mice were infected with PR8 influenza virus. 2DG treatment was initiated two weeks before infection and maintained until termination at d 10 post infection. **a** Body weight loss. The graph shows means + s. e. m. of N = 5 per group. Comparisons were made between untreated B6 and TC mice, and between treated and control B6 mice by 2-way ANOVA. **b** Representative FACS plots (left) and frequencies shown as stacked columns (right) of NP-specific and NP-Tet<sup>neg</sup> T<sub>FH</sub> cells gated as CD4<sup>+</sup>CD44<sup>+</sup>CXCR5<sup>+</sup>PD-1<sup>+</sup>Bcl6<sup>+</sup>. For clarity, the individual values for the NP-Tet<sup>+</sup> samples are not shown. MFI of phospho-S6 (**c**), phospho-STAT3 (**d**), and Ki-67 (**e**) were analyzed in influenza virus NP-specific (CD4<sup>+</sup>CD44<sup>+</sup>CXCR5<sup>+</sup>PD-1<sup>+</sup>Bcl6<sup>+</sup>NP-Tet<sup>pos</sup>) and non-specific (CD4<sup>+</sup>CD44<sup>+</sup>CXCR5<sup>+</sup>PD-1<sup>+</sup>Bcl6<sup>+</sup>NP-Tet<sup>neg</sup>) T<sub>FH</sub> cells. **f-g** Frequency and number of IFN $\gamma$ <sup>+</sup>CD4<sup>+</sup> T cells (**f**) and IFN $\gamma$ <sup>+</sup>NP-Tet<sup>pos</sup> CD4<sup>+</sup> T cells (**g**) in the spleen of 2DG-treated TC mice and controls. **h-k** Analysis of NP-Tet<sup>pos</sup> CD8<sup>+</sup> T cells in the spleen of 2DG-treated B6 and TC mice and controls. Total number of cells (**h**), frequency and number of SLEC NP-Tet<sup>pos</sup> CD8<sup>+</sup> T cells (**i**) and MPEC NP-Tet<sup>pos</sup> CD8<sup>+</sup> T cells (**j**), and NP-Tet<sup>pos</sup> SLEC/MPEC ratio (**k**). **b-k**: Mean + s. e. m. of N = 3-5 mice per group compared with t tests. \**P* < 0.05, \*\**P* < 0.01, and \*\*\**P* < 0.001.

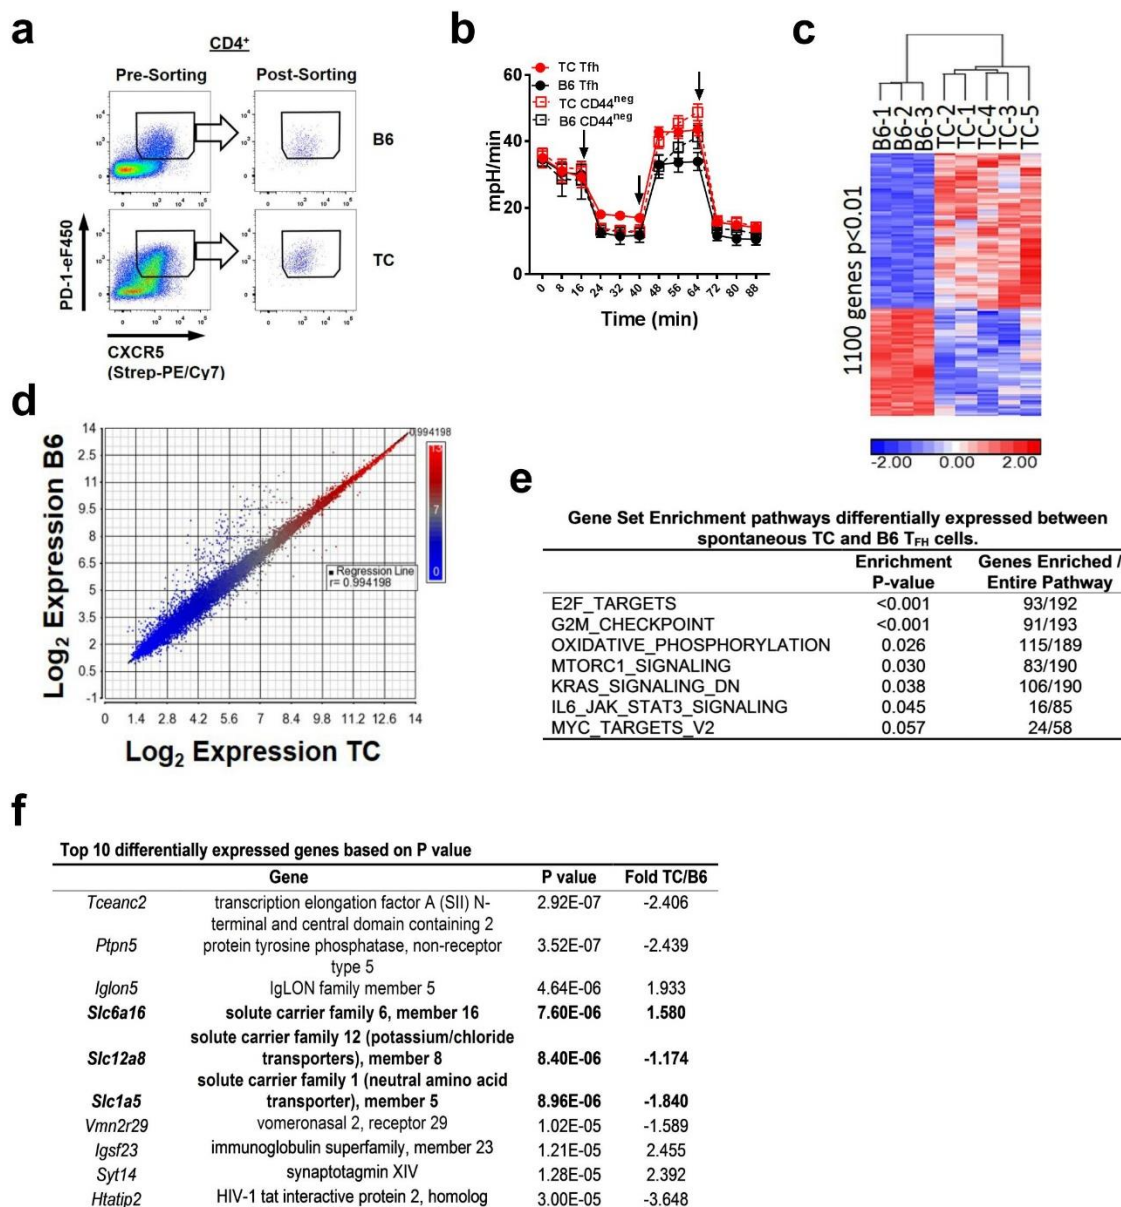

**Supplementary Fig. 5** Comparison of metabolism and gene expression between TC and B6 T<sub>FH</sub> cells. **a** Gating strategy to sort CD4<sup>+</sup>CXCR5<sup>+</sup>PD-1<sup>+</sup> T<sub>FH</sub> cells from the spleen of 7-8 month-old TC and B6 mice. **b** OCR during a mitochondrial stress test conducted on T<sub>FH</sub> (CD4<sup>+</sup>CD44<sup>+</sup>PD-1<sup>hi</sup>PSGL-1<sup>lo</sup>) and CD44<sup>-</sup>CD4<sup>+</sup> T cells, with the arrows indicating from left to right the addition of oligomycin, FCCP, and actinomycin A plus rotenone. **c-d** Microarray results of the comparison between spontaneous T<sub>FH</sub> cells sorted from B6 (left) and TC (right) mice shown as a heat map (**c**) and scatter plot (**d**). Heatmap coloring is mean centered (white), standard deviation normalized to 1 with red indicating above average expression and blue for below average expression (c). Dotplot coloring is based on signal intensity Robust Microarray Average (RMV) normalized values, blue is lowest and red is highest expression (d). All values from 0 to 14 are shown. **e-f** Gene Set Enrichment pathways differentially expressed between the two strains (**e**) and top 10 differentially expressed genes (**f**) based on the microarray results. Bold face indicate solute transporter genes.

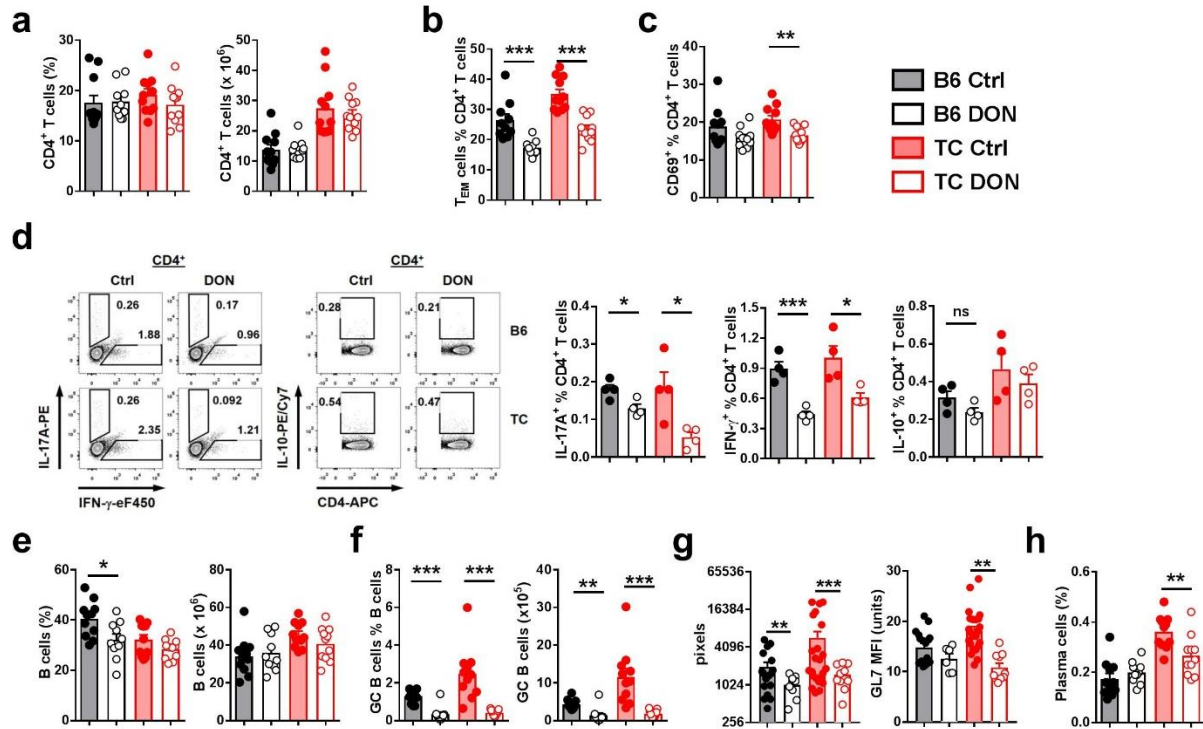

**Supplementary Fig. 6** Effect of DON on TD-immunized mice. B6 and TC mice were immunized with NP-KLH in alum and treated with DON, then analyzed at 10 d after immunization as shown in Fig. 7a. **a** Frequency and number of total CD4<sup>+</sup> T cells. Frequency of T<sub>EM</sub> cells (**b**) and CD69<sup>+</sup>CD4<sup>+</sup> cells (**c**). **d** After stimulating splenocytes with PMA and ionomycin in the presence of GolgiStop, CD4<sup>+</sup> T cells were analyzed for the frequency of IL-17A<sup>+</sup>, IFN $\gamma$ <sup>+</sup>, and IL-10<sup>+</sup> cells. Representative FACS plots of IL-17A<sup>+</sup>, IFN $\gamma$ <sup>+</sup>, and IL-10<sup>+</sup> cells are shown on the left. **e-f** Frequency and number of total B cells (**e**) and GC B cells (**f**). **g** GC surface area as measured by GL7<sup>+</sup> pixels (left) and GL7 intensity in these areas (right), in 3-5 high power fields from 2 mice per group. **h** Absolute number of plasma cells. All cells were analyzed from spleens. Mean + s. e. m. of N = 4-11 mice per group (except g) compared with t tests. \**P* < 0.05, \*\**P* < 0.01, and \*\*\**P* < 0.001.

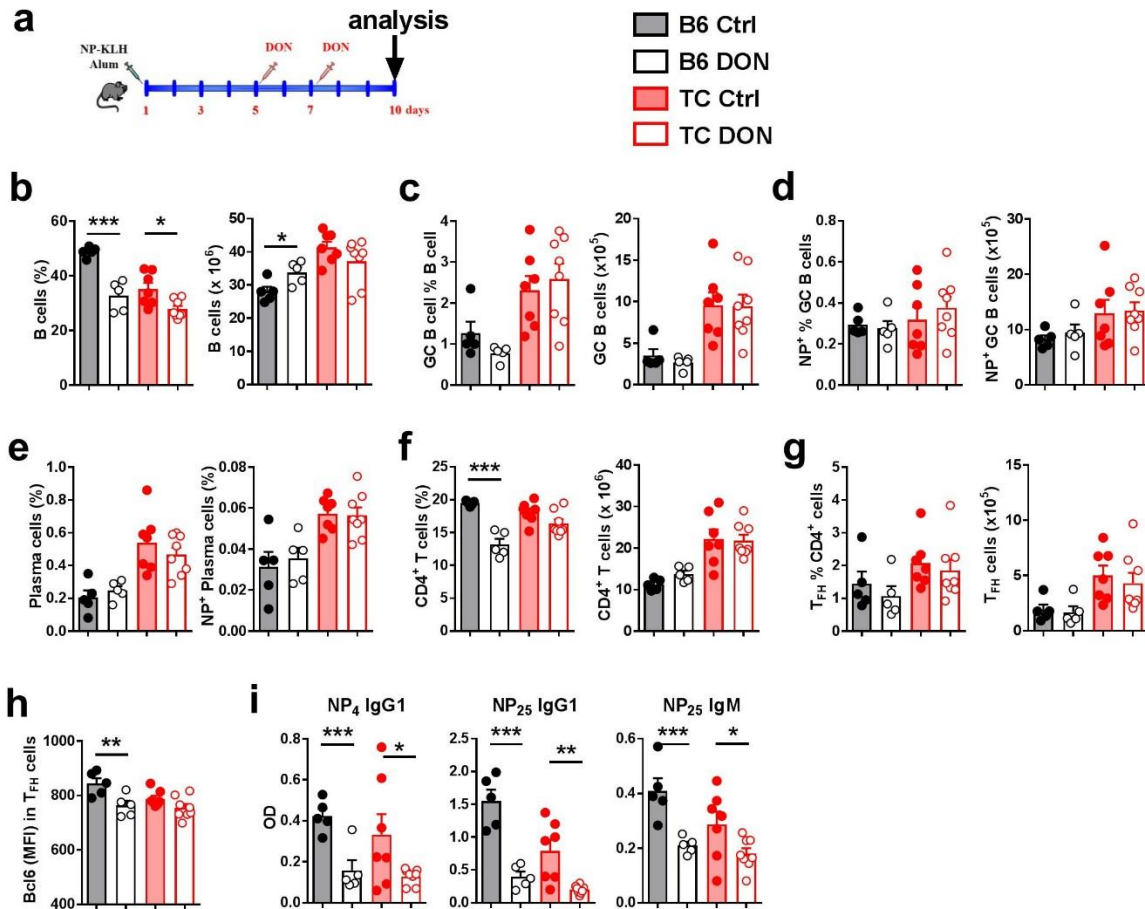

**Supplementary Fig. 7** Effect of DON treatment at the time of GC formation on TD response. **a** Experimental design for immunization with NP-KLH in alum and treatment with glutamine antagonist DON in B6 and TC mice. **b-d** Frequency and number of total B cells (**b**), and total (**c**) or NP-specific (**d**) GC B cells. **e** Frequency of total and NP-specific plasma cells. Frequency and number of total CD4<sup>+</sup> T cells (**f**) and T<sub>FH</sub> cells (**g**). **h** MFI of Bcl6 in T<sub>FH</sub> cells. Serum levels of high affinity anti-NP<sub>4</sub>, low affinity anti-NP<sub>25</sub> IgG1, and IgM NP-specific antibodies (**i**), and anti-dsDNA IgG (**j**). All cells were analyzed from spleens. Mean + s. e. m. of N = 5-8 mice per group compared with t tests. \**P* < 0.05, \*\**P* < 0.01, and \*\*\**P* < 0.001.

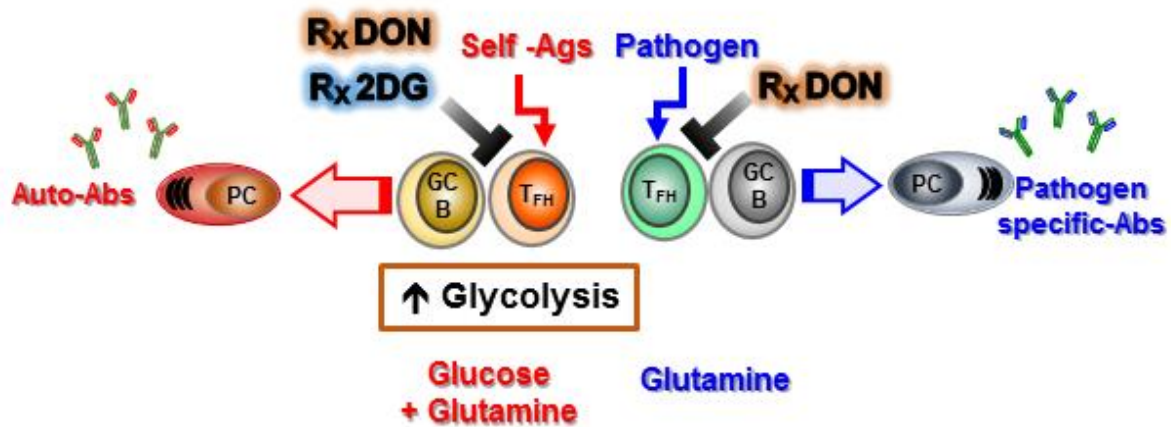

**Supplementary Fig. 8** The differentiation of autoreactive T<sub>FH</sub> and Ag-specific T<sub>FH</sub> is driven by different metabolic programs. Results presented in this study support the following working model: The production of class-switched antibodies, either in response to TD-antigens or autoantigens requires glutamine and can be blocked with DON. In addition, spontaneous differentiation and expansion of T<sub>FH</sub> cells in lupus-prone mice depends on glucose metabolism. This process and the subsequent GC B cell expansion and autoantibody production can be blocked with 2DG. On the other hand, exogenous Ag or pathogen-driven T<sub>FH</sub> differentiation and expansion is glucose-independent, and therefore not affected by 2DG.



**Supplementary Table 1. Solute transporter genes in microarray**

| Gene Symbol | RefSeq       | Common Name/Alias | Family/Class                              | p-value  | Mean(B6) | Mean(TC) | Fold Change (B6/TC) |
|-------------|--------------|-------------------|-------------------------------------------|----------|----------|----------|---------------------|
| Slc1a4      | NM_018861    | Asct1             | Glutamate Transporters                    | 0.000773 | 5.66315  | 6.7095   | -2.0653             |
| Slc6a16     | XM_355900    |                   | Sodium and Chloride Symporters            | 7.60E-06 | 3.99995  | 4.65977  | -1.57988            |
| Slc37a2     | NM_001145960 | Ci2               | Sugar/Phosphate Exchanger                 | 0.027843 | 6.63055  | 7.15405  | -1.43744            |
| Slc16a10    | NM_001114332 | Mct10             | Monocarboxylate Transporters              | 0.016609 | 5.96864  | 6.38305  | -1.33276            |
| Slc38a6     | NM_001037717 |                   | Neutral aa Transporters                   | 0.000384 | 6.01913  | 6.31227  | -1.22531            |
| Slc22a15    | NM_001039371 |                   | Cation/Anion/Zwitterion Transporters      | 0.043912 | 7.52101  | 7.75334  | -1.17473            |
| Slc2a6      | NM_001177627 | Glut6             | Glucose Transporter Class III             | 0.022024 | 6.0159   | 6.24314  | -1.17059            |
| Slco2a1     | NM_033314    | Pgt               | Organic Anion Transporters                | 0.011966 | 4.42929  | 4.62264  | -1.14342            |
| Slc16a3     | NM_001038653 | Mct3              | Monocarboxylate Transporters              | 0.037375 | 6.29594  | 6.47036  | -1.12851            |
| Slc6a13     | NM_144512    | Gat3              | Sodium and Chloride Symporters            | 0.017071 | 4.32363  | 4.49628  | -1.12713            |
| Slco3a1     | NM_001038643 | Anr1              | Organic Anion Transporters                | 0.024044 | 7.1862   | 7.35027  | -1.12044            |
| Slc22a17    | NM_021551    | Boit              | Cation/Anion/Zwitterion Transporters      | 0.043028 | 6.04775  | 6.20162  | -1.11255            |
| Slc26a9     | NM_177243    |                   | Anion Exchanger                           | 0.034369 | 4.10769  | 4.25696  | -1.10901            |
| Slc25a18    | NM_001081048 |                   | Mitochondrial                             | 0.033406 | 4.82682  | 4.94371  | -1.08439            |
| Slc5a10     | NM_001033227 | SglT5             | Sodium Glucose Cotransporters             | 0.048219 | 4.4636   | 4.57481  | -1.08013            |
| Slc2a13     | NM_001033633 | Glut13, Hmit      | Glucose Transporter Class III             | 0.043971 | 4.08132  | 4.19247  | -1.08008            |
| Slc13a4     | NM_172892    | Sut1              | Sodium Sulfate/Carboxylate Cotransporters | 0.041359 | 4.21033  | 4.2763   | -1.04679            |
| Slc5a6      | NM_001177621 |                   | Sodium Glucose Cotransporters             | 0.038632 | 5.84172  | 5.72638  | 1.08323             |
| Slc35b1     | NM_016752    | Ugtrel1           | Nucleoside Sugar Transporters             | 0.028039 | 7.00047  | 6.84446  | 1.1142              |
| Slc52a3     | NM_001164819 | Rft2              | Riboflavin Transporter                    | 0.0128   | 7.19199  | 7.02814  | 1.12027             |
| Slc7a5      | NM_011404    | Lat1 (CD98)       | Fatty Acid Transporter                    | 0.010204 | 7.22403  | 7.04819  | 1.12962             |
| Slc12a8     | NM_001083902 | Ccc9              | Cation-Chloride Cotransporter             | 8.40E-06 | 5.00232  | 4.77056  | 1.17426             |
| Slc20a2     | NM_011394    | Pit2              | Sodium-Phosphate Cotransporters           | 0.008263 | 7.09636  | 6.85588  | 1.18138             |
| Slc35d1     | NM_177732    | Ugtrel7           | Nucleoside Sugar Transporters             | 0.016514 | 5.98879  | 5.7228   | 1.20246             |
| Slc28a2     | NM_172980    | Cnt2              | Sodium Nucleoside Transporters            | 0.019055 | 8.60788  | 8.28789  | 1.24832             |
| Slc14a1     | NM_001171010 | Utb1              | Urea Transporters                         | 0.00656  | 7.43778  | 7.07222  | 1.28838             |

| Gene Symbol | RefSeq       | Common Name/Alias | Family/Class                      | p-value  | Mean(B6) | Mean(TC) | Fold Change (B6/TC) |
|-------------|--------------|-------------------|-----------------------------------|----------|----------|----------|---------------------|
| Slc43a3     | NM_021398    | Eeg1              | System L aa Transporters          | 0.003683 | 7.60423  | 7.21813  | 1.30685             |
| Slc7a10     | NM_017394    | Asc-1             | Heterodimeric aa Transporters     | 0.010705 | 7.27029  | 6.56092  | 1.63509             |
| Slc1a5      | NM_009201    | Asct2             | Glutamate Transporters            | 8.96E-06 | 8.50362  | 7.62381  | 1.84013             |
| Slc43a1     | NM_001081349 | Lat3              | System L aa Transporters          | 0.004064 | 6.47416  | 5.55887  | 1.88595             |
| Slc15a2     | NM_001145899 | Pept2             | Proton Oligopeptide Cotransporter | 0.029135 | 6.08086  | 5.0802   | 2.00091             |

**Supplementary Table 2. nCounter™ CodeSet Design**

| HUGO Gene | Accession      | Position  | Ect |
|-----------|----------------|-----------|-----|
| Ahr       | NM_013464.4    | 1328-1427 |     |
| Ascl2     | NM_008554.2    | 346-445   |     |
| Bcl2      | NM_009741.3    | 1845-1944 |     |
| Bcl6      | NM_009744.3    | 186-285   |     |
| Calm3     | NM_007590.3    | 1981-2080 |     |
| Camk2d    | NM_001025439.1 | 1316-1415 |     |
| Ccnb1     | NM_172301.3    | 2137-2236 |     |
| Ccr4      | NM_009916.2    | 395-494   |     |
| Ccr6      | NM_001190333.1 | 661-760   |     |
| Cd109     | NM_153098.3    | 2721-2820 |     |
| Cd48      | NM_007649.4    | 371-470   |     |
| Cdc25c    | NM_009860.2    | 43-142    |     |
| Cdc26     | NM_139291.3    | 313-412   |     |
| Cdkn3     | NM_028222.1    | 279-378   |     |
| Cpt1c     | NM_001252470.1 | 1135-1234 |     |
| Csf1      | NM_001113530.1 | 834-933   |     |
| Cx3cr1    | NM_009987.3    | 2697-2796 |     |
| Cxcr5     | NM_007551.2    | 1649-1748 |     |
| Cyp1b1    | NM_009994.1    | 115-214   |     |
| Cyp51     | NM_020010.2    | 2186-2285 |     |
| Dhdh      | NM_027903.3    | 571-670   |     |
| Dusp6     | NM_026268.2    | 1649-1748 |     |
| Egr2      | NM_010118.2    | 1786-1885 |     |
| Ezh2      | NM_007971.2    | 426-525   |     |
| Fbxo5     | NM_025995.2    | 476-575   |     |
| Foxo1     | NM_019739.2    | 2531-2630 |     |

| HUGO Gene | Accession      | Position  | Ect          |
|-----------|----------------|-----------|--------------|
| Foxo3     | NM_019740.2    | 2222-2321 |              |
| Foxp3     | NM_054039.2    | 195-294   |              |
| Galm      | NM_176963.4    | 175-274   |              |
| Gata3     | NM_008091.3    | 1944-2043 |              |
| Gusb      | NM_010368.1    | 1736-1835 | Housekeeping |
| Hdac9     | NM_024124.2    | 1521-1620 |              |
| Hif1a     | NM_010431.2    | 1295-1394 |              |
| Hprt      | NM_013556.2    | 31-130    | Housekeeping |
| Hsd17b7   | NM_010476.3    | 677-776   |              |
| Ifitm1    | NM_001112715.1 | 413-512   |              |
| Ifitm2    | NM_030694.1    | 10-109    |              |
| Ifnar1    | NM_010508.1    | 1196-1295 |              |
| Ifng      | NM_008337.1    | 96-195    |              |
| Igf2r     | NM_010515.1    | 2586-2685 |              |
| Il13      | NM_008355.2    | 426-525   |              |
| Il13ra1   | NM_133990.4    | 846-945   |              |
| Il17a     | NM_010552.3    | 206-305   |              |
| Il21      | NM_021782.2    | 1763-1862 |              |
| Il22      | NM_016971.1    | 478-577   |              |
| Il23r     | NM_144548.1    | 691-790   |              |
| Il4       | NM_021283.1    | 346-445   |              |
| Il6       | NM_031168.1    | 41-140    |              |
| Il9r      | NM_008374.2    | 2818-2917 |              |
| Irf4      | NM_013674.1    | 1879-1978 |              |
| Itgae     | NM_008399.1    | 776-875   |              |
| Kif11     | NM_010615.1    | 4176-4275 |              |

| HUGO Gene | Accession      | Position  | Ect          |
|-----------|----------------|-----------|--------------|
| Lbr       | NM_133815.1    | 1196-1295 |              |
| Ldhd      | NM_027570.3    | 421-520   |              |
| Lrig1     | NM_008377.2    | 4356-4455 |              |
| Msmo1     | NM_025436.2    | 201-300   |              |
| Mtus1     | NM_001005863.2 | 4231-4330 |              |
| Nr4a1     | NM_010444.1    | 1316-1415 |              |
| Nr4a2     | NM_001139509.1 | 363-462   |              |
| Nrros     | NM_146069.4    | 3286-3385 |              |
| Pdcd1     | NM_008798.1    | 1135-1234 |              |
| Plk1      | NM_011121.3    | 1481-1580 |              |
| Plk4      | NM_011495.2    | 1661-1760 |              |
| Polr2a    | NM_009089.2    | 2221-2320 | Housekeeping |
| Ppic      | NM_008908.4    | 136-235   |              |
| Prkca     | NM_011101.3    | 6966-7065 |              |
| Pten      | NM_008960.2    | 5161-5260 |              |
| Ptpn14    | NM_008976.2    | 967-1066  |              |
| Ptpn5     | NM_001163565.1 | 2771-2870 |              |
| Pttg1     | NM_001131054.1 | 289-388   |              |
| Rorc      | NM_011281.2    | 649-748   |              |
| Rpl19     | NM_009078.1    | 21-120    | Housekeeping |
| Slamf1    | NM_013730.4    | 923-1022  |              |
| Slamf6    | NM_030710.2    | 806-905   |              |
| Slamf8    | NM_029084.3    | 1367-1466 |              |
| Slc15a2   | NM_021301.2    | 2216-2315 |              |
| Slc16a10  | NM_001114332.1 | 649-748   |              |
| Slc16a3   | NM_001038653.1 | 1106-1205 |              |
| Slc1a4    | NM_018861.3    | 2136-2235 |              |

| HUGO Gene | Accession      | Position  | Ect |
|-----------|----------------|-----------|-----|
| Slc1a5    | NM_009201.2    | 1705-1804 |     |
| Slc2a6    | NM_172659.2    | 1411-1510 |     |
| Slc37a2   | NM_020258.4    | 1287-1386 |     |
| Slc43a1   | NM_001083809.1 | 577-676   |     |
| Slc43a3   | NM_021398.3    | 1297-1396 |     |
| Slc6a16   | NM_001324535.1 | 2321-2420 |     |
| Slc7a10   | NM_017394.4    | 1055-1154 |     |
| Smad1     | NM_008539.3    | 241-340   |     |
| Smad4     | NM_008540.2    | 2886-2985 |     |
| Smad7     | NM_001042660.1 | 3558-3657 |     |
| Smad9     | NM_019483.4    | 2574-2673 |     |
| Sostdc1   | NM_025312.3    | 722-821   |     |
| Sqle      | NM_009270.3    | 1931-2030 |     |
| Stat1     | NM_009283.3    | 1591-1690 |     |
| Stat3     | NM_213659.2    | 1361-1460 |     |
| Stat5a    | NM_011488.2    | 1546-1645 |     |
| Stat5b    | NM_011489.3    | 4856-4955 |     |
| Tbx21     | NM_019507.2    | 545-644   |     |
| Tlr7      | NM_133211.3    | 3211-3310 |     |
| Tlr9      | NM_031178.2    | 1802-1901 |     |
| Tnf       | NM_013693.2    | 515-614   |     |

**Supplementary Table 3. Antibodies information**

| Target Antigen  | Conjugatin      | Clone        | vendor         | Catalog # | Dilution |
|-----------------|-----------------|--------------|----------------|-----------|----------|
| Bcl2            | PE/Cy7          | BCL/10C4     | BioLegend      | 633511    | 1:100    |
| Bcl-6           | Alexa Fluor 647 | K112-91      | BD Biosciences | 561525    | 1:100    |
| CD4             | Alexa Fluor 700 | GK1.5        | eBiosciences   | 56-0041   | 1:100    |
|                 | APC             | RM4-5        | BioLegend      | 100516    | 1:100    |
|                 | eFlour 450      | GK1.5        | eBiosciences   | 48-0041   | 1:100    |
|                 | FITC            | RM4-5        | BD Biosciences | 553047    | 1:100    |
| CD8a            | PerCP/Cy5.5     | 53-6.7       | BioLegend      | 100734    | 1:200    |
| CD16/CD32       | Purified        | 2.4G2        | BD Biosciences | 553140    | 1:500    |
| CD45R/B220      | PE-CF594        | RA3-6B2      | BD Biosciences | 562290    | 1:100    |
| CD44            | PE              | IM7          | Biolegend      | 103008    | 1:100    |
|                 | PE/Cy7          | IM7          | Biolegend      | 103030    | 1:100    |
|                 | V500            | IM7          | BD Biosciences | 560780    | 1:100    |
| CD62L           | APC             | MEL-14       | BD Biosciences | 553152    | 1:100    |
| CD69            | PE/Cy7          | H1.2F3       | BioLegend      | 104512    | 1:100    |
| CD95            | Biotin          | Jo2          | BD Biosciences | 554256    | 1:100    |
| CD98            | PE              | RL388        | eBiosciences   | 12-0981   | 1:100    |
| CD127 (IL-7R)   | BV421           | A7R34        | BioLegend      | 135027    | 1:50     |
| CD138           | APC             | 281-2        | Biolegend      | 142506    | 1:100    |
| CD154 (CD40L)   | APC             | MR1          | BioLegend      | 106510    | 1:100    |
| CD162           | Alexa Fluor 647 | 2PH1         | BD Biosciences | 562806    | 1:100    |
|                 | BV510           | 2PH1         | BD Biosciences | 563448    | 1:100    |
| CD278 (ICOS)    | PE              | 7E.17G9      | BD Biosciences | 552146    | 1:100    |
| CD279 (PD-1)    | eFlour 450      | RMP1-30      | eBioscience    | 48-9981   | 1:100    |
| CXCR5           | Purified        | 2G8          | BD Biosciences | 551961    | 1:100    |
| FOXP3           | PE              | FJK-16s      | eBioscience    | 12-5773   | 1:100    |
| GL7             | eFlour 450      | GL-7         | eBioscience    | 48-5902   | 1:100    |
| Hif-1 $\alpha$  | Alexa Fluor700  | 241812       | R&D Systems    | IC1935N   | 1:20     |
| IFN- $\gamma$   | Pacific Blue    | XMG1.2       | BioLegend      | 505818    | 1:100    |
| IL-10           | PE/Cy7          | JES5-16E3    | BioLegend      | 505026    | 1:100    |
| IL-17A          | PE              | TC11-18h10.1 | Biolegend      | 506-904   | 1:100    |
| KLRG1           | PE/Cy7          | 2F1          | Biolegend      | 138415    | 1:1000   |
| Ki-67           | PE/Cy7          | SoIA15       | eBioscience    | 25-2698   | 1:1000   |
| pStat 3 (pY705) | PE              | LUVNKI.A     | eBioscience    | 12-9033   | 1:25     |
| pS6             | Alexa Fluor 647 | D57.2.2E     | Cell Signaling | 4851S     | 1:100    |
| IgD[b]          | FITC            | 217-170      | BD Biosciences | 553510    | 1:100    |
| Streptavidin    | PE/Cy7          |              | BD Biosciences | 5126578   | 1:100    |
|                 | PerCP           |              | BD Biosciences | 554064    | 1:100    |

**Supplementary Table 4. Primer sequences for qPCR**

| Gene Name                           | Forward (5' – 3')      | Reverse (5' – 3')       | Product (bp) |
|-------------------------------------|------------------------|-------------------------|--------------|
| <i>Slc1a4</i><br>( <i>Asct1</i> )   | AGCAGCCATCTTCCAGTGTG   | CCGTGGCAGTCACTAGAATGG   | 101          |
| <i>Slc2a6</i><br>( <i>Glut6</i> )   | CTCTACGCCCTTGGTCTGC    | ATCATGATGAGAACCGGCC     | 74           |
| <i>Slc7a10</i><br>( <i>Asc-1</i> )  | CCAAGTCTGGTGGGGACTAC   | CAGAGCAGTAGGAATCCAGCC   | 70           |
| <i>Slc16a10</i><br>( <i>Mct10</i> ) | CGTGAGTGTCTTCACGGACA   | GAGGCTCGATGGAGCTTACA    | 110          |
| <i>Slc37a2</i>                      | CAGGGCTCATCAGCGACTAC   | GGAACATCATGGGAGCAGCC    | 81           |
| <i>Slc16a3</i><br>( <i>Mct4</i> )   | TCACGGGTTTCTCCTACGC    | GCCAAAGCGGTTACACAC      | 167          |
| <i>Hif1a</i>                        | AGCTTCTGTTATGAGGCTCACC | TGACTTGATGTTTCATCGTCCTC | 391          |
| <i>Ppia</i>                         | GCTGTTTGCAGACAAAGTTCCA | CGTGTAAGTCACCACCCTGG    | 138          |
| <i>Hmbs</i>                         | AGATGGGCAACTGTACCTGAC  | GGATGGTGGCCTGCATAGTC    | 83           |
